# Supplementary material for: Pyridoxine induces glutathione synthesis via PKM2-mediated Nrf2 transactivation and confers neuroprotection
Source: PubMed Central journal article supplement (PMC7029000; doi:10.1038/s41467-020-14788-x), 2020-02-18
Supplement: 41467_2020_14788_MOESM1_ESM.pdf [file 41467_2020_14788_MOESM1_ESM.pdf]

## **Supplementary Information**

### **Pyridoxine induces glutathione synthesis via PKM2-mediated Nrf2 transactivation and confers neuroprotection**

Yao Wei et al.

#### **Table of contents**

Supplementary figures 1-8

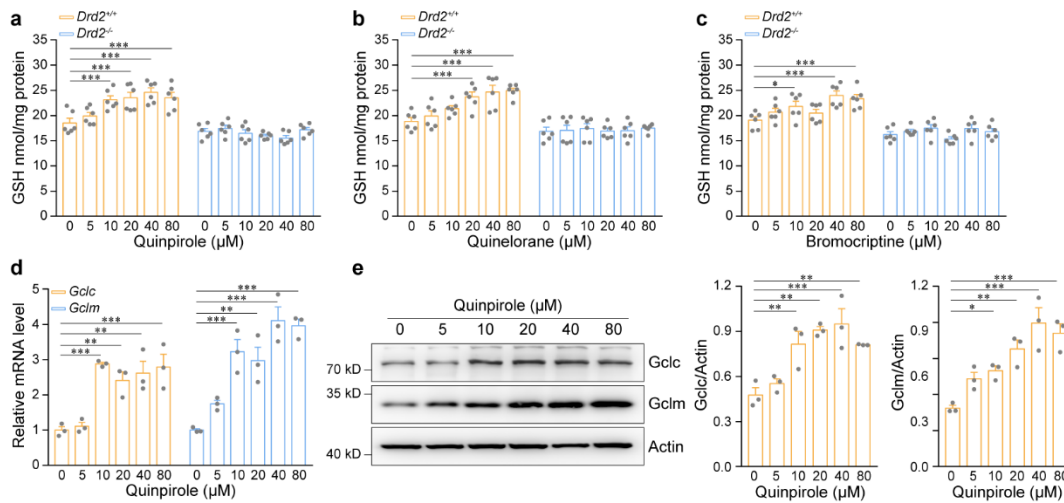

**Supplementary Fig. 1** Astrocytic DRD2 facilitates Gclc/Gclm expression and GSH synthesis. **a-c** GSH levels in astrocytes from wild-type mice or *Drd2*-knockout mice after treatment with 0, 5, 10, 20, 40, or 80 μM quinpirole (a), quinolorane (b) or bromocriptine (c) for 12 h. Six independent experiments per condition. **d, e** Astrocytes were treated with 0, 5, 10, 20, 40, or 80 μM quinpirole, and *Gclc*/*Gclm* mRNA was analyzed by qRT-PCR (d) and immunoblotting with actin as a loading control (e). Three independent experiments per condition. Data are presented as the mean ± s.e.m. \**P* < 0.05, \*\**P* < 0.01, \*\*\**P* < 0.001. One-way ANOVA with Dunnett's multiple comparisons test (d, e). Two-way ANOVA with Dunnett's multiple comparisons test (a-c). Blots are included in the source data file.

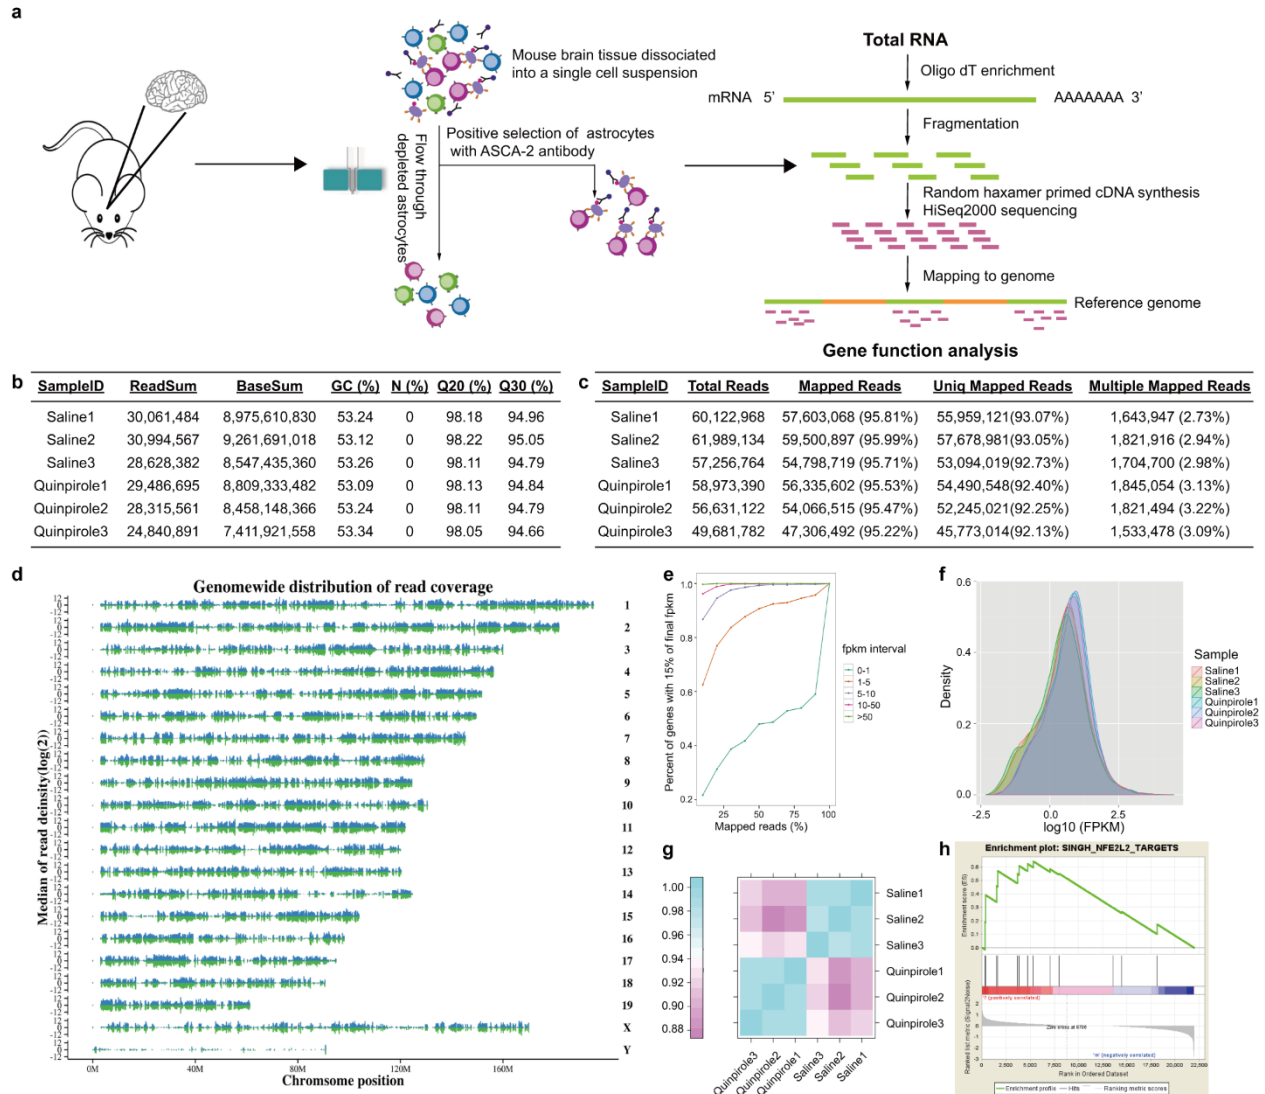

**Supplementary Fig. 2** RNA-seq in astrocytes after DRD2 activation. **a** Schematic diagram of astrocyte separation from the adult mouse brain and RNA-seq. **b** Quality control of RNA-seq data. **c** The efficiency of clean reads mapped to the reference sequence. **d** Representative genome-wide distribution of read coverage. **e** Representative saturation analysis of RNA-seq data. **f** Density distribution of FPKM. **g** Pearson's correlation coefficient of RNA-seq data. **h** Gene set enrichment analysis plot of Nrf2 targets.

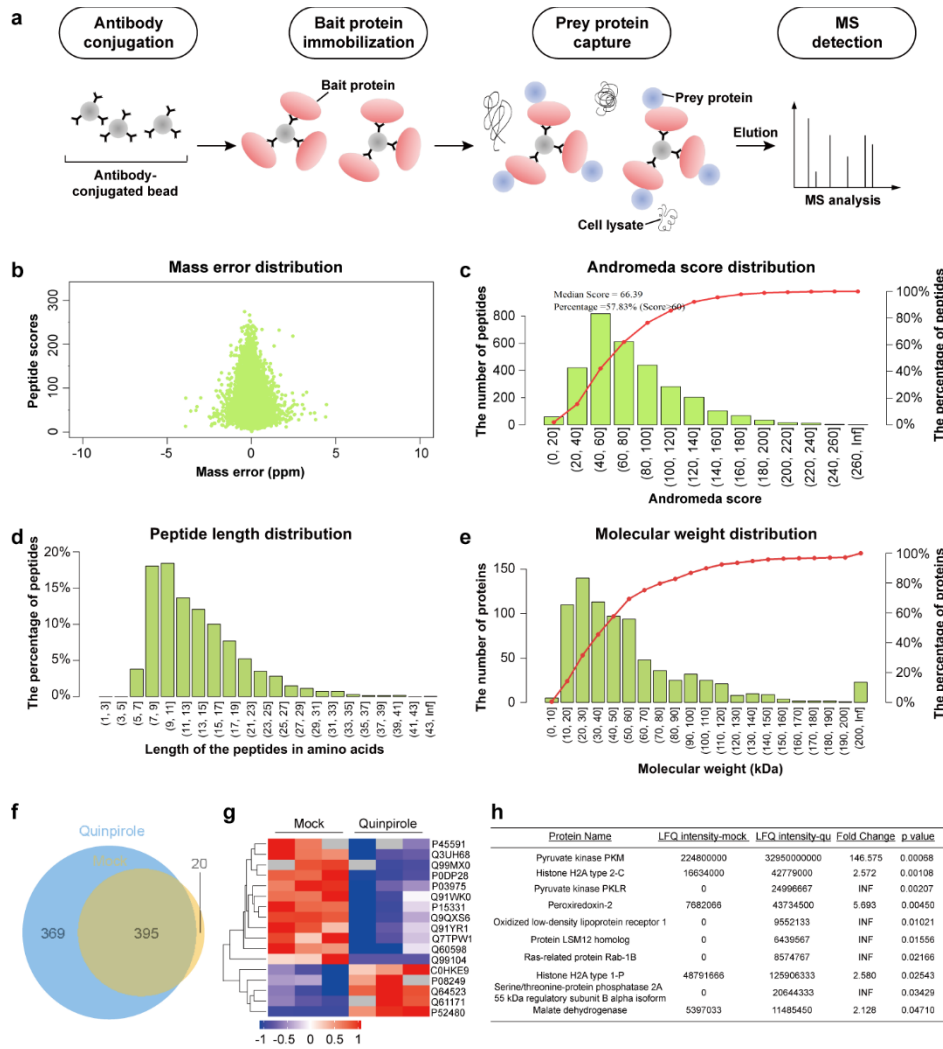

**Supplementary Fig. 3** Mass spectrometry quantification of proteins that bind to Nrf2 after DRD2 activation. **a** Schematic diagram of the anti-Nrf2 pull-down assay and label-free detection. **b** Mass error distribution of peptide scores. **c** Andromeda score distribution of the identified peptides. **d** Peptide length distribution. **e** The molecular weight distribution of the identified proteins. **f** Venn diagram showing the overlapping proteins identified under two conditions. **g** Hierarchical clustering of the differentially expressed protein profiles. **h** Proteins that bound Nrf2 with a more than 2-fold greater abundance and a p-value less than 0.05 after DRD2 activation.

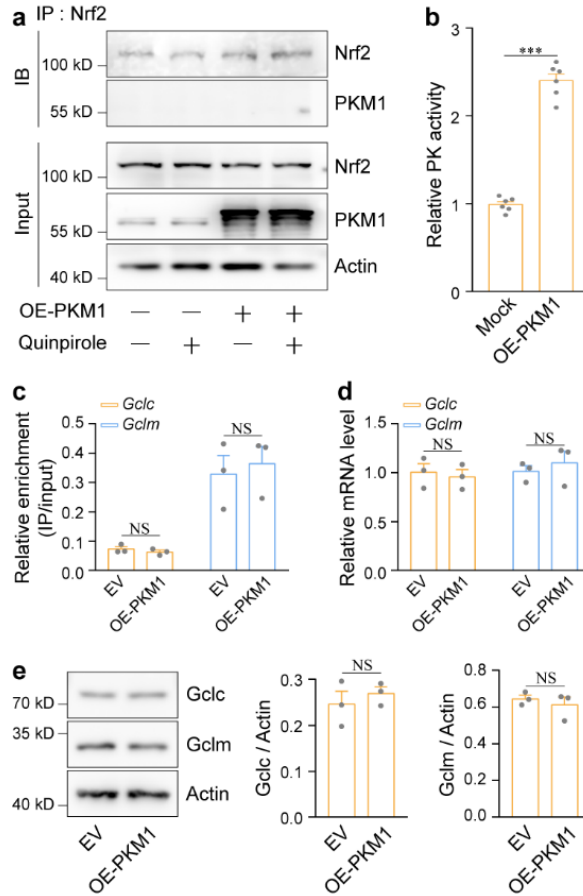

**Supplementary Fig. 4** PKM1 does not bind Nrf2 or affect its transcriptional activity. **a-e** Primary astrocytes transfected with adenovirus overexpressing empty vector (EV) or PKM1 (OE-PKM1) were stimulated with 10  $\mu$ M quinpirole for 12 h. Immunoblot analysis of PKM1 in cell lysates immunoprecipitated with a Nrf2 antibody (a). Pyruvate kinase activity (b). The amount of anti-Nrf2-immunoprecipitated DNA was analyzed by qRT-PCR with primers flanking the *Gclc* and *Gclm* promoter regions (c). *Gclc* and *Gclm* mRNA detected by qRT-PCR (d). Immunoblotting with actin as a loading control (left) and densitometric analysis of Gclc/Gclm (right) (e). Immunoblotting and qRT-PCR: three independent experiments; pyruvate kinase activity assay: six independent experiments. Data are presented as the mean  $\pm$  s.e.m. \*\*\* $P < 0.001$ , NS, not significant. Student's two-tailed unpaired *t*-test (b-e).

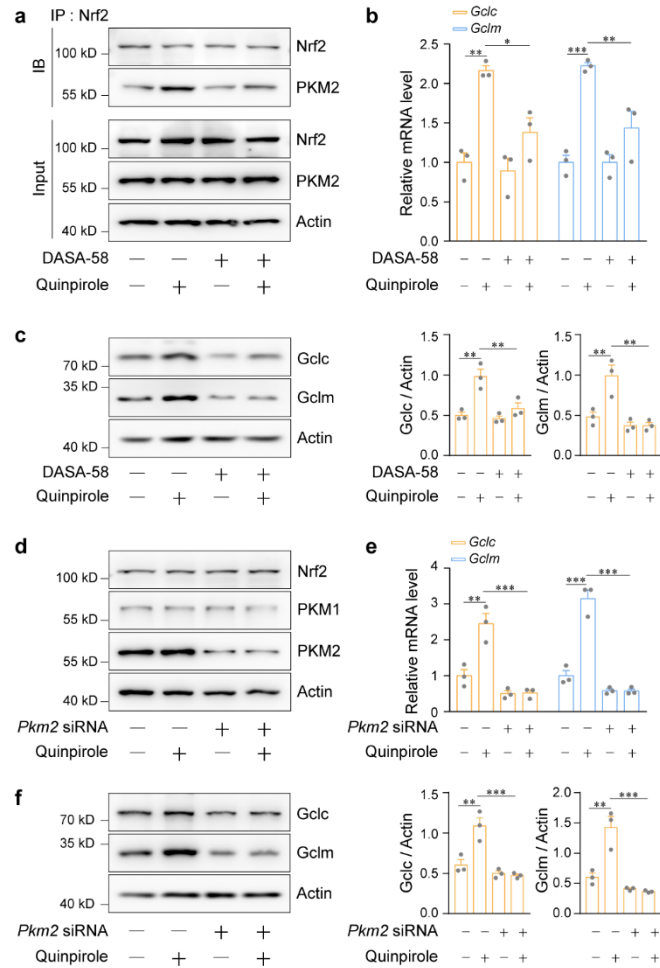

**Supplementary Fig. 5** DRD2 activation promotes Nrf2 transactivation via PKM2. **a-c** Primary astrocytes were pretreated with 50  $\mu$ M DASA-58 for 1 h and then stimulated with 10  $\mu$ M quinpirole for 12 h. Immunoblot analysis of PKM2 in cell lysates immunoprecipitated with an Nrf2 antibody (a). *Gclc* and *Gclm* mRNA detected by qRT-PCR (b). Immunoblotting with actin as a loading control (left) and densitometric analysis of Gclc/Gclm (right) (c). Immunoblotting and qRT-PCR: three independent experiments. **d-f** Primary astrocytes transfected with *Pkm2*-specific siRNA were stimulated with 10  $\mu$ M quinpirole for 12 h. Immunoblotting with actin as a loading control (d). *Gclc* and *Gclm* mRNA detected by qRT-PCR (e). Immunoblotting with actin as a loading control (left) and densitometric analysis of Gclc/Gclm (right) (f). Immunoblotting and

qRT-PCR: three independent experiments. Data are presented as the mean  $\pm$  s.e.m. \* $P$  < 0.05, \*\* $P$  < 0.01, \*\*\* $P$  < 0.001. One-way ANOVA with Tukey's multiple comparisons test (b, c, e and f).

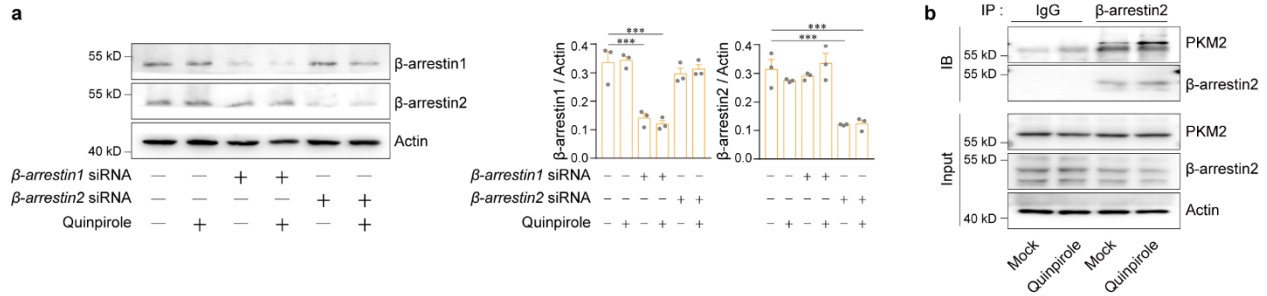

**Supplementary Fig. 6** DRD2 activation triggers  $\beta$ -arrestin2 to bind and dimerize PKM2. **a** Primary astrocytes transfected with  $\beta$ -arrestin1- or  $\beta$ -arrestin2-specific siRNA were stimulated with 10  $\mu$ M quinpirole for 12 h. Immunoblotting with actin as a loading control (left) and densitometric analysis of  $\beta$ -arrestin1/ $\beta$ -arrestin2 (right). Three independent experiments per condition. **b** Immunoblot analysis of PKM2 in 10  $\mu$ M quinpirole-stimulated astrocyte lysates immunoprecipitated with the  $\beta$ -arrestin2 antibody. Three independent experiments per condition. Data are presented as the mean  $\pm$  s.e.m. \*\*\* $P$  < 0.001. One-way ANOVA with Dunnett's multiple comparisons test (a).



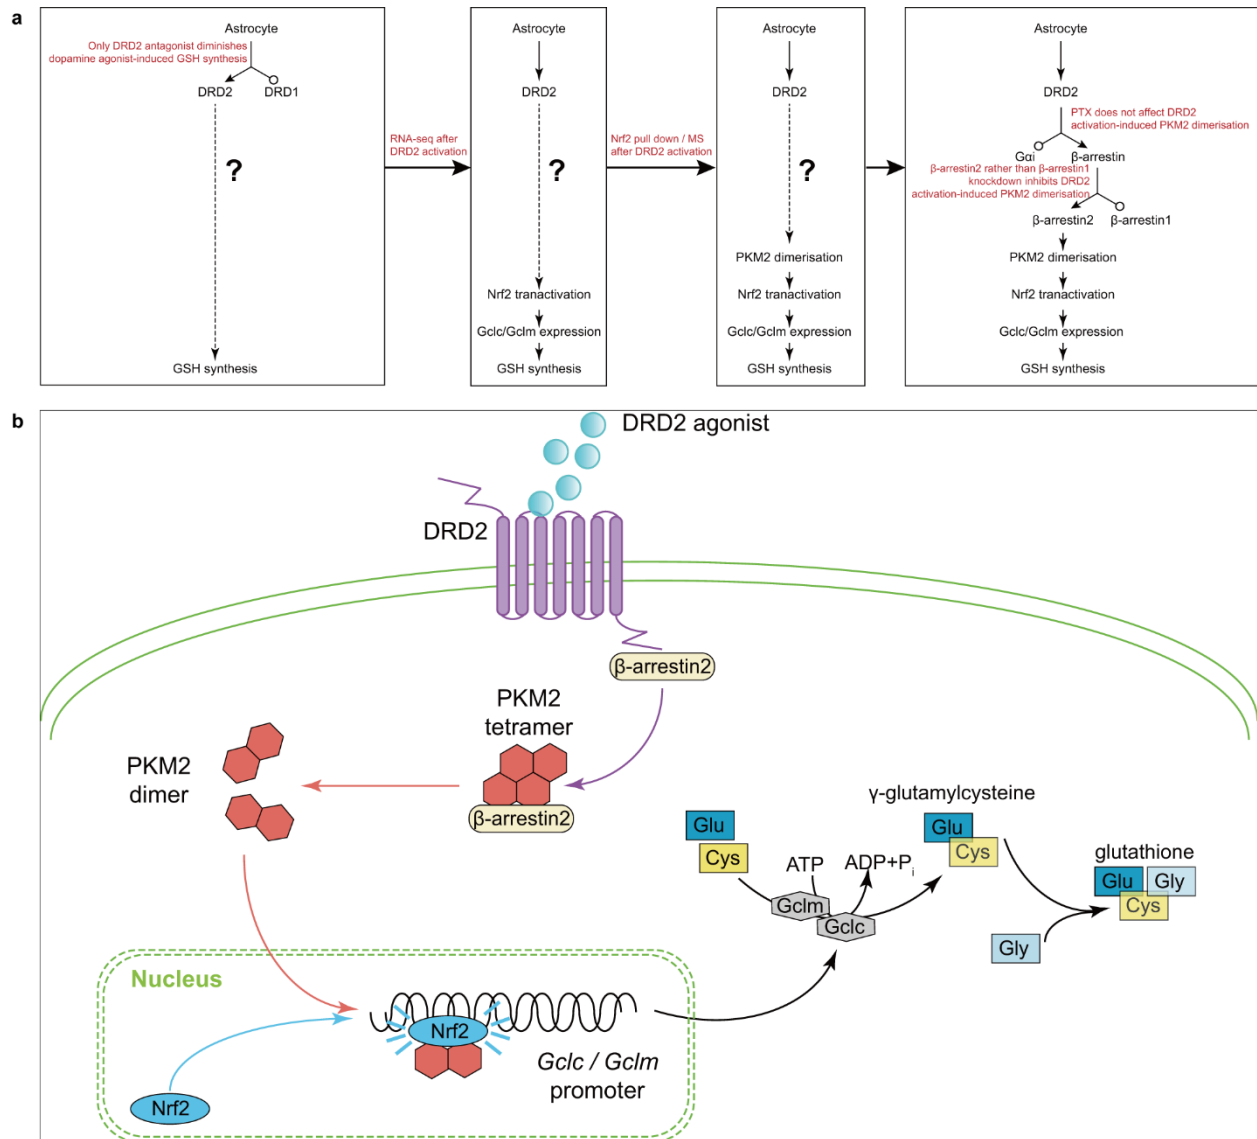

**Supplementary Fig. 7** Schematic summary. **a** Schematic description of the experimental procedure. **b** Schematic summarizing the mechanism by which DRD2 activation triggers the binding of  $\beta$ -arrestin2 to PKM2 and promotes PKM2 dimerization, resulting in Nrf2 transactivation and GSH biosynthesis.

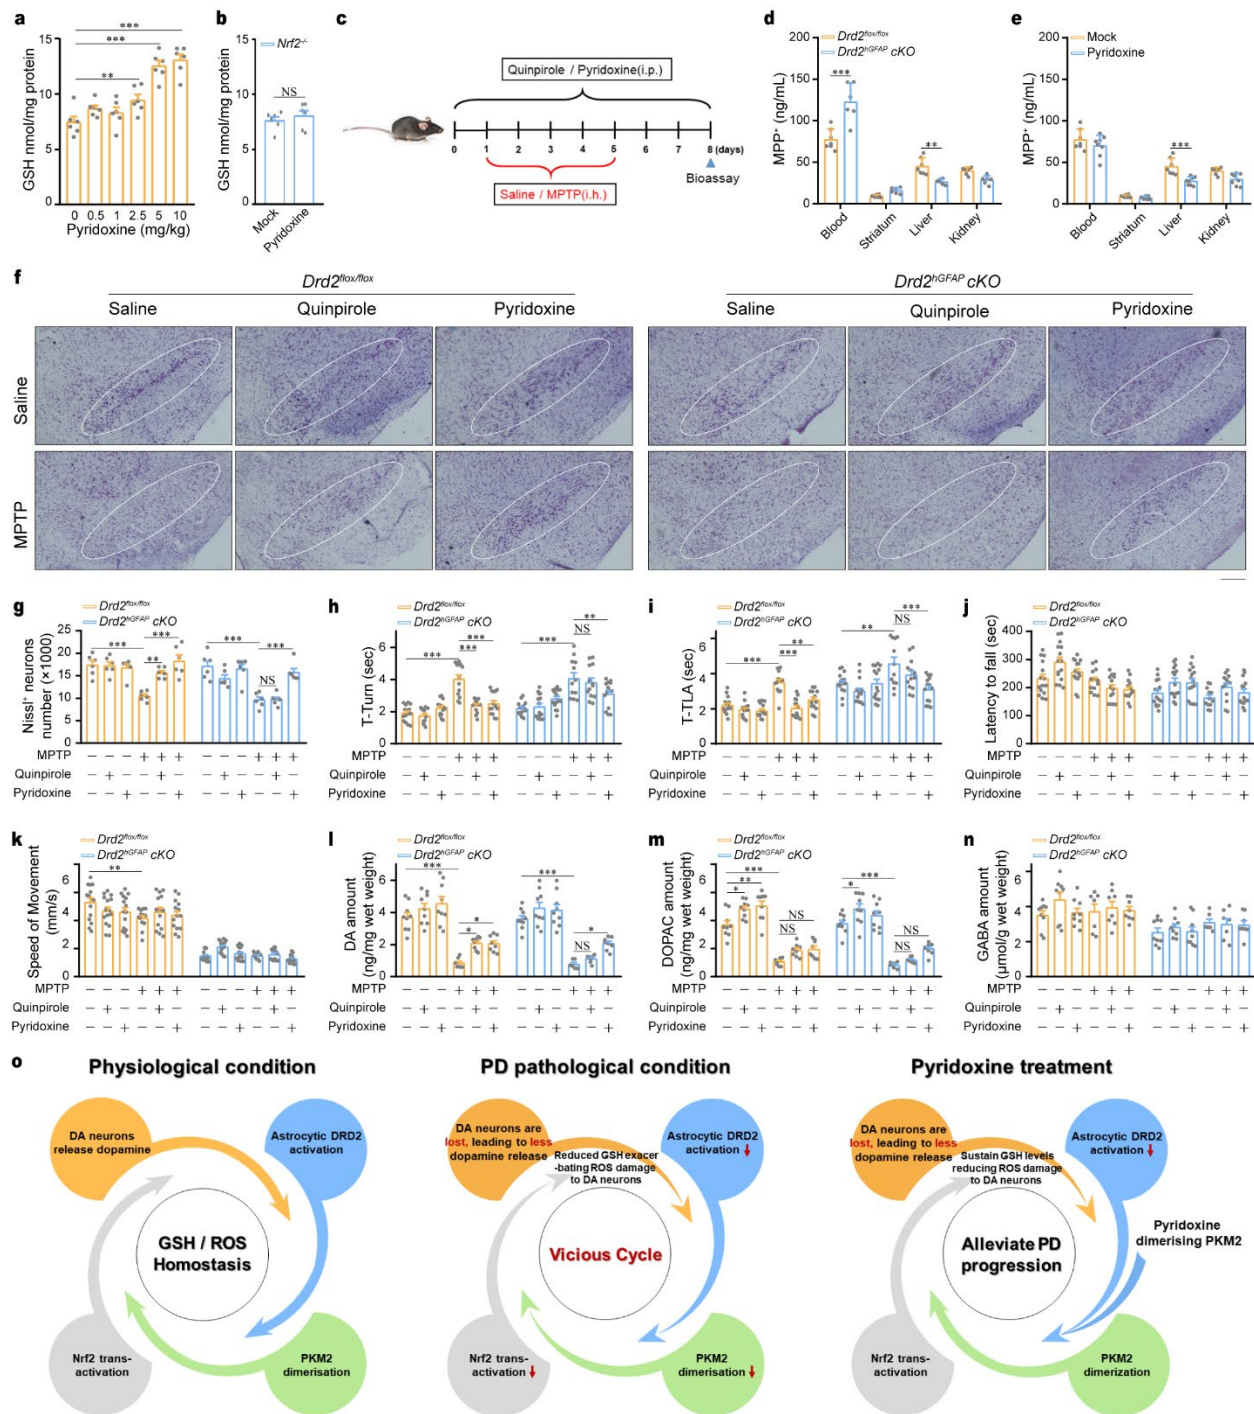

**Supplementary Fig. 8** Pyridoxine reduces dopaminergic neuron loss in the PD mouse model. **a** Striatal GSH levels in wild-type mice administered 0.5, 1, 2.5, 5, or 10 mg kg<sup>-1</sup> pyridoxine for 7 days. n=6 mice per group. **b** Striatal GSH levels in *Nrf2*-knockout mice administered 5 mg kg<sup>-1</sup> pyridoxine for 7 days. n=6 mice per group. **c** Experimental procedure and different drug

administration schemes. **d-n** *Drd2<sup>lox/lox</sup>* and *Drd2<sup>hGFAP</sup> cKO* mice were used to generate an MPTP-induced PD mouse model (20 mg kg<sup>-1</sup> i.h., 5 d), which was treated with continuous infusion of quinpirole (5 mg kg<sup>-1</sup> i.p.) or pyridoxine (5 mg kg<sup>-1</sup> i.p.). MPP<sup>+</sup> levels in the blood, striatum, liver, and kidney detected by HPLC (d, e). Nissl staining of neurons (f). Quantification of Nissl-positive neurons (g). Times required for mice to turn around (h) and descend a pole (i) in the pole test. Latency time in the rotarod test (j). Mouse activities in an open field within 5 min (k). Striatal dopamine (l), DOPAC (m) and GABA (n) levels detected by HPLC. n=6-8 mice per group for HPLC; n=6 mice per group for Nissl staining; n=12-15 mice per group for behavioral assays. Scale bar, 200 μm. **o** Schematic summarizing the vicious cycle of decreased dopamine release—DRD2 signaling deficiency—decreased GSH synthesis—oxidative stress—dopaminergic neuron death in PD and showing how directly dimerizing PKM2 is a possible strategy for breaking this vicious cycle and potentially alleviating PD progression. Data are presented as the mean ± s.e.m. \**P* < 0.05, \*\**P* < 0.01, \*\*\**P* < 0.001, NS, not significant. One-way ANOVA with Dunnett's multiple comparisons test (a). Two-way ANOVA with Sidak's multiple comparisons test (d, e) or with Tukey's multiple comparisons test (g-n). Student's two-tailed unpaired *t*-test (b).
