# Supplementary material for: Pyridoxine induces glutathione synthesis via PKM2-mediated Nrf2 transactivation and confers neuroprotection
Source: PubMed Central journal article supplement (PMC7029000; doi:10.1038/s41467-020-14788-x), 2020-02-18
Supplement: 41467_2020_14788_MOESM3_ESM.pdf [file 41467_2020_14788_MOESM3_ESM.pdf]

## **Description of Additional Supplementary Files**

**File name:** Supplementary Data 1

**Description:** RNA sequence data referring to Fig. 1g and Supplementary Fig. 2.

**File name:** Supplementary Data 2

**Description:** Label-free mass spectrometry data referring to Fig. 2a and Supplementary Fig. 3.

**File name:** Supplementary Data 3

**Description:** NanoDSF data referring to Fig. 5a.
